# Supplementary material for: Metal–organic framework-derived 2D layered double hydroxide ultrathin nanosheets for efficient electrocatalytic hydrogen evolution reaction
Source: Royal Society of Chemistry journal article supplement (doi:10.1039/d2cc03994j), 2022-01-01
Supplement: d2cc03994j1.pdf [file d2cc03994j1.pdf]

## Supporting Information

### **Metal-Organic Framework-Derived 2D Layered Double Hydroxide Ultrathin Nanosheets for Efficient Electrocatalytic Hydrogen Evolution Reaction**

*Jie Song,<sup>‡a</sup> Jeng-Lung Chen,<sup>‡b</sup> Zichen Xu<sup>a</sup> and Ryan Yeh-Yung Lin<sup>\*a</sup>*

<sup>a</sup> State Key Laboratory of Fine Chemicals, Zhang Dayu School of Chemistry, Dalian University of Technology, Dalian, Liaoning 116024, China

Email: [yylin@dlut.edu.cn](mailto:yylin@dlut.edu.cn)

<sup>b</sup> National Synchrotron Radiation Research Center, Hsinchu 300092, Taiwan

<sup>‡</sup> Jie Song and Jeng-Lung Chen contributed equally to this work.

## 1. Experimental section

### 1.1 Materials

Copper chloride dihydrate ( $\text{CuCl}_2 \cdot 2\text{H}_2\text{O}$ ,  $\geq 99.0\%$ ) was purchased from Titan Scientific Co., Ltd. (Shanghai, China). Cupric nitrate trihydrate ( $\text{Cu}(\text{NO}_3)_2 \cdot 3\text{H}_2\text{O}$ , 99%), iron nitrate nonahydrate ( $\text{Fe}(\text{NO}_3)_3 \cdot 9\text{H}_2\text{O}$ , 98%), urea (99%), ammonium fluoride ( $\text{NH}_4\text{F}$ , 97%), *N,N*-dimethylformamide (DMF,  $\geq 99.9\%$ ), methanol (MeOH, 99.9%), ethanol (EtOH, 99.5%), xylene (99%) and  $\text{H}_2\text{PtCl}_6$  ( $\geq 99.9\%$ ) were purchased from Energy Chemical Technology Co., Ltd. (Shanghai, China). Iron chloride tetrahydrate ( $\text{FeCl}_2 \cdot 4\text{H}_2\text{O}$ ,  $\geq 99.0\%$ ) was obtained from Acros Organics (New Jersey, USA).  $\text{NaBH}_4$  (AR) was purchased from Damao Chemical Reagent Factory (Tianjin, China). KOH was provided by Aladdin Chemistry Co., Ltd. (Shanghai, China).

### 1.2 Synthesis of CuFe(dobpdc)

CuFe(dobpdc) was prepared according to the reported literature procedures with slight modifications.<sup>17</sup> Typically,  $\text{CuCl}_2 \cdot 2\text{H}_2\text{O}$  (0.17 mmol),  $\text{FeCl}_2 \cdot 4\text{H}_2\text{O}$  (0.087 mmol) and  $\text{H}_4\text{dobpdc}$  (0.10 mmol) were added to a 50 mL dried Schlenk flask under  $\text{N}_2$ . Subsequently, the dry solvent mixture of DMF (10 mL), ethanol (2 mL) and deionized water (1 mL) was injected into the flask and heated at 120 °C for 24 h under  $\text{N}_2$ . After the reaction, the as-synthesized CuFe(dobpdc) was washed three times with DMF and twice with methanol. Finally, CuFe(dobpdc) was dried at 100 °C under vacuum overnight.

### 1.3 Synthesis of CuFe-LDHm

CuFe(dobpdc) (60 mg) was immersed in 4.0 M KOH solution (10 mL) for 7 h at 50 °C. The resulting product (CuFe-LDHm) was then washed with deionized water for three times, and dried at 80 °C overnight in a vacuum oven.

### 1.4 Synthesis of Pt@CuFe-LDHm

CuFe-LDHm (30 mg) was dispersed in 0.5 g L<sup>-1</sup> H<sub>2</sub>PtCl<sub>6</sub> solution (3 mL) for 2 h at room temperature. Then, the mixture solution was centrifuged and washed several times with deionized water and dried at 80 °C overnight in a vacuum oven. The vacuum-dried product was immersed in 0.2 M NaBH<sub>4</sub> solution (3.0 mL) for 2 h at room temperature. Finally, the obtained product (Pt@CuFe-LDHm) was collected and washed by deionized water and dried at 80 °C overnight in a vacuum oven.

### **1.5 Synthesis of CuFe-LDHs**

Cu(NO<sub>3</sub>)<sub>2</sub>·3H<sub>2</sub>O (2.0 mmol), Fe(NO<sub>3</sub>)<sub>3</sub>·9H<sub>2</sub>O (1.0 mmol), urea (10 mmol) and NH<sub>4</sub>F (4.0 mmol) were dissolved in deionized water (8.0 mL) and then transferred to a 20 mL Teflon<sup>®</sup> vessel under ultrasonication for 15 min. Then the reaction vessel was put into an oven reacting at 120 °C for 6 h. Finally, the product was washed by deionized water for three times and dried at 80 °C overnight in a vacuum oven.

### **1.6 Synthesis of CuFe-LDHs-sheet**

CuFe-LDHs (50 mg) was dispersed in xylene and sonicated for 3 days. Then, the product was washed by ethanol for three times and dried at 80 °C overnight in a vacuum oven.

### **1.7 Synthesis of Pt@CuFe-LDHs-sheet**

CuFe-LDHs-sheet (30 mg) was dispersed in 0.5 g L<sup>-1</sup> H<sub>2</sub>PtCl<sub>6</sub> solution (3 mL) for 2 h at room temperature. Then, the mixture solution was centrifuged and washed several times with deionized water and dried at 80 °C overnight in a vacuum oven. The vacuum-dried product was immersed in 0.2 M NaBH<sub>4</sub> solution (3.0 mL) for 2 h at room temperature. Finally, the obtained product (Pt@CuFe-LDHs-sheet) was collected and washed by deionized water and dried at 80 °C overnight in a vacuum oven.

### **1.8 Material Characterizations**

PXRD patterns of the prepared electrocatalysts was characterized with a Rigaku SmartLab 9kW powder X-ray diffractometer equipped with a Cu K $\alpha$  radiation source. FTIR spectra

were obtained using a Shimadzu IRTracer-100 in the range of 400-4000  $\text{cm}^{-1}$ . The elemental contents were analyzed by Perkin Elmer Avio 500 ICP-OES. FESEM images were recorded on a NOVA NanoSEM 450 instrument. TEM images and corresponding EDS mappings were recorded on a FEI Tecnai G2F30 S-TWIN field emission transmission electron microscope equipped with energy-dispersive X-ray spectroscope. AFM was conducted on a Bruker Nanowizard 4XP instrument to determine the thickness of the nanosheets. XPS was performed on a Thermo Scientific K-Alpha+ instrument with an Al K $\alpha$  excitation source, and the binding energies were referenced to C 1s peak at 284.8 eV. The BET surface areas were calculated from N<sub>2</sub> adsorption/desorption isotherms with a Micromeritics 3Flex instrument at 77 K in liquid N<sub>2</sub> baths and the purity of N<sub>2</sub> gas was 99.999%. Prior to the measurement, the prepared electrocatalysts were activated at 413 K for 18 h under high vacuum.

### **1.9 X-ray Absorption Spectroscopy Analysis**

XANES and EXAFS spectra of Cu and Fe K-edges were recorded with quick-scan method<sup>1</sup> in the transmission mode under ambient conditions at TPS 44A beamline in National Synchrotron Radiation Research Center (NSRRC) in Taiwan. The EXAFS analysis was carried out by performing Fourier transform on  $k^3$ -weighted EXAFS oscillations to evaluate the contribution of each bond pair to the Fourier transform peak.

### **1.10 Electrochemical Measurements**

All electrochemical measurements were executed in a three-electrode system using a CHI760E electrochemical workstation (Shanghai Chenhua, China). Platinum plate (1 cm  $\times$  1 cm) and Hg/HgO electrode were used as the counter electrode and reference electrode, respectively, and the prepared electrocatalysts served as the working electrode. The working electrode was prepared by the following procedure: 10 mg of prepared electrocatalyst (CuFe(dobpdc), CuFe-LDHm, CuFe-LDHs, CuFe-LDHs-sheet, Pt@CuFe-LDHs-sheet,

Pt@CuFe-LDHm and Pt/C) and 3  $\mu\text{L}$  of 5wt% Nafion solution were added into 2 mL of THF, followed by ultrasonication for 1 h to form a homogeneous catalyst ink. Then 20  $\mu\text{L}$  of the prepared ink was dropped on the surface of the NF (1 cm  $\times$  1 cm) and dried at 80  $^{\circ}\text{C}$  in a vacuum oven for 1 h. 1.0 M KOH, 0.1 M KOH and 1.0 M PBS were used as the electrolytes which were purged with  $\text{N}_2$  for 30 min. Before the electrochemical tests, the working electrode undertook 30 cycles of CV at a scan rate of 50  $\text{mV s}^{-1}$  to reach a stable state. LSV curves were carried out with a scan rate of 5  $\text{mV s}^{-1}$ . The potentials referred to the reversible hydrogen electrode (RHE) were calculated according to the equation:  $E_{\text{RHE}} = E_{\text{Hg/HgO}} + 0.059 \times \text{pH} + 0.098 \text{ V}$ . The Tafel slopes were calculated with the following equation:  $\eta = b \times \log j + a$ , where  $\eta$  is the overpotential,  $j$  is the current density, and  $b$  is the Tafel slope. EIS measurements were recorded in the frequency range of  $10^5$  Hz to 0.1 Hz with an amplitude of 5 mV. ECSA of the electrocatalysts were evaluated using  $C_{\text{dl}}$  measured by CV in the non-faradaic region.

## 2. Supplementary Figures

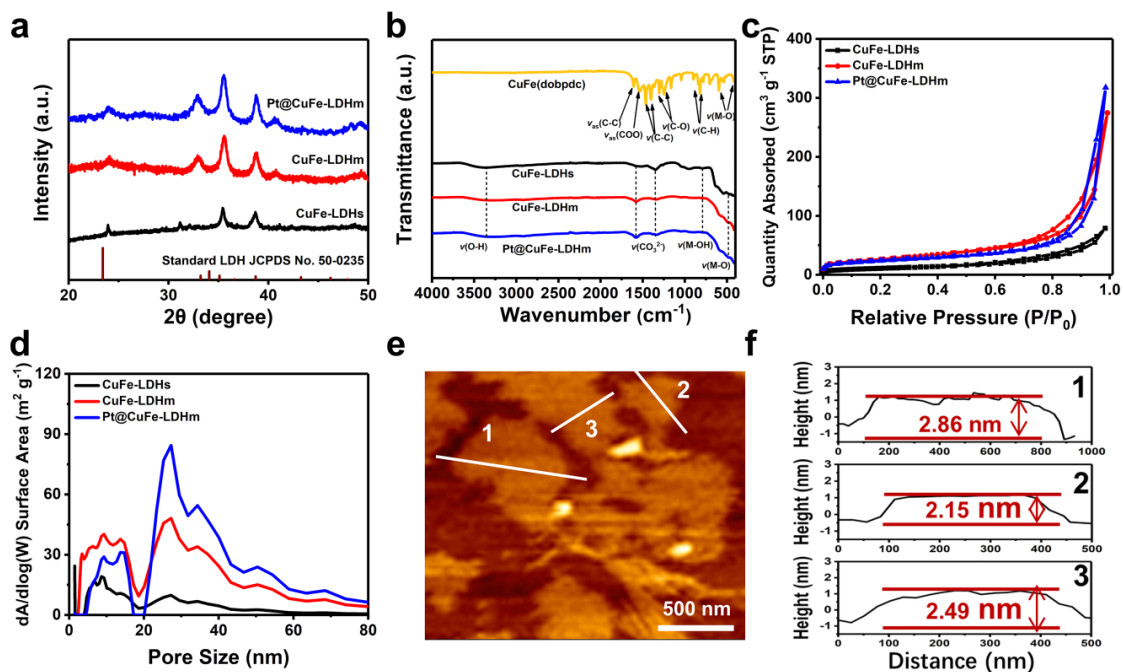

**Fig. S1.** (a) PXRD patterns of CuFe-LDHs, CuFe-LDHm and Pt@CuFe-LDHm. (b) FTIR spectra of CuFe(dobpdc), CuFe-LDHs, CuFe-LDHm and Pt@CuFe-LDHm. (c) N<sub>2</sub> adsorption and desorption isotherms at 77 K and (d) corresponding pore size distributions of CuFe-LDHs, CuFe-LDHm and Pt@CuFe-LDHm. (e) AFM image and (f) the corresponding height profile of Pt@CuFe-LDHm.

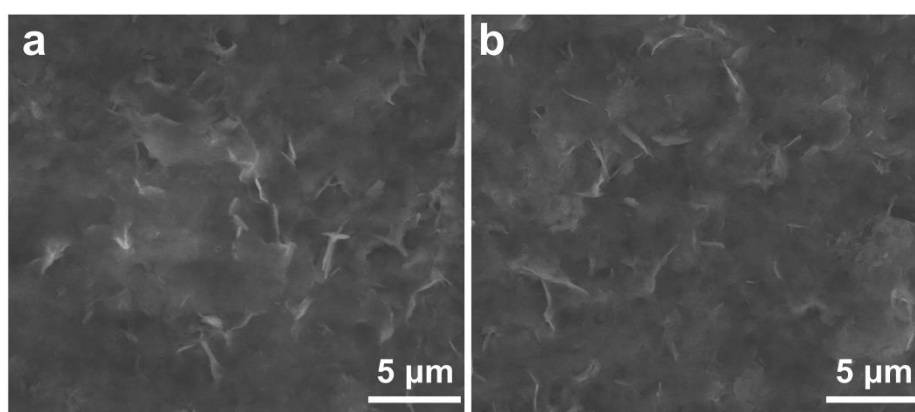

**Fig. S2.** The FESEM images of (a) CuFe-LDHs-sheet and (b) Pt@CuFe-LDHs-sheet.

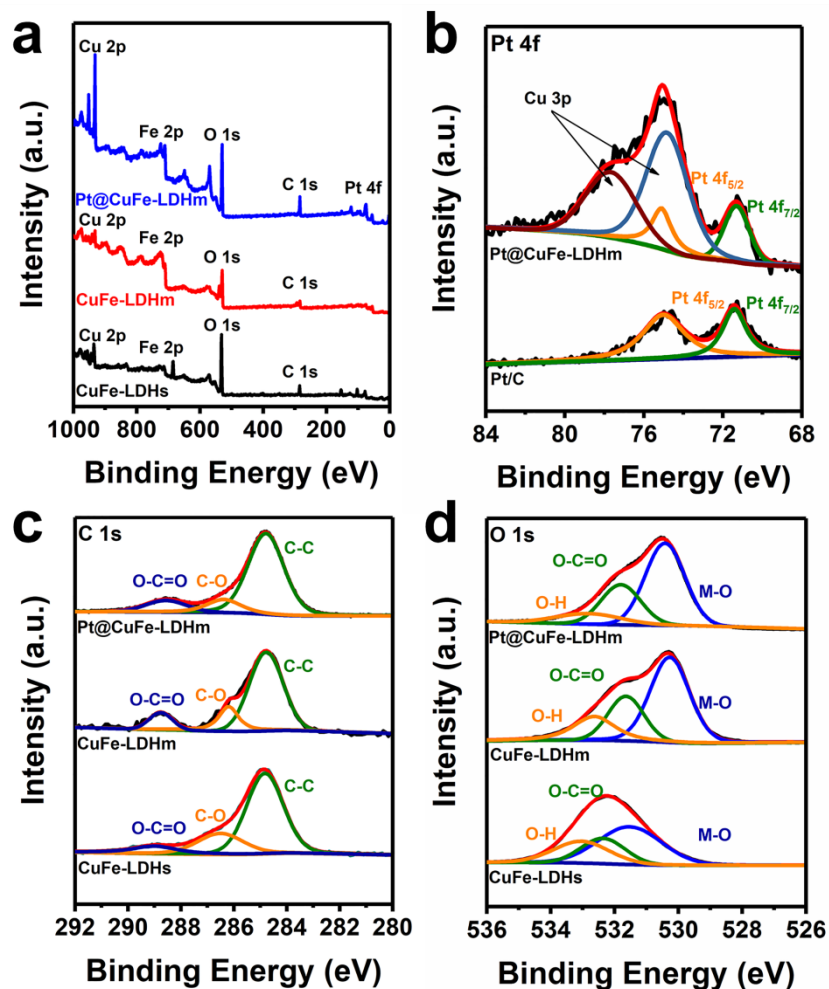

**Fig. S3.** (a) XPS survey spectra for CuFe-LDHs, CuFe-LDHm and Pt@CuFe-LDHm. High-resolution XPS spectra of (b) Pt 4f for Pt@CuFe-LDHm. High-resolution XPS spectra of (c) C 1s and (d) O 1s for CuFe-LDHs, CuFe-LDHm and Pt@CuFe-LDHm.

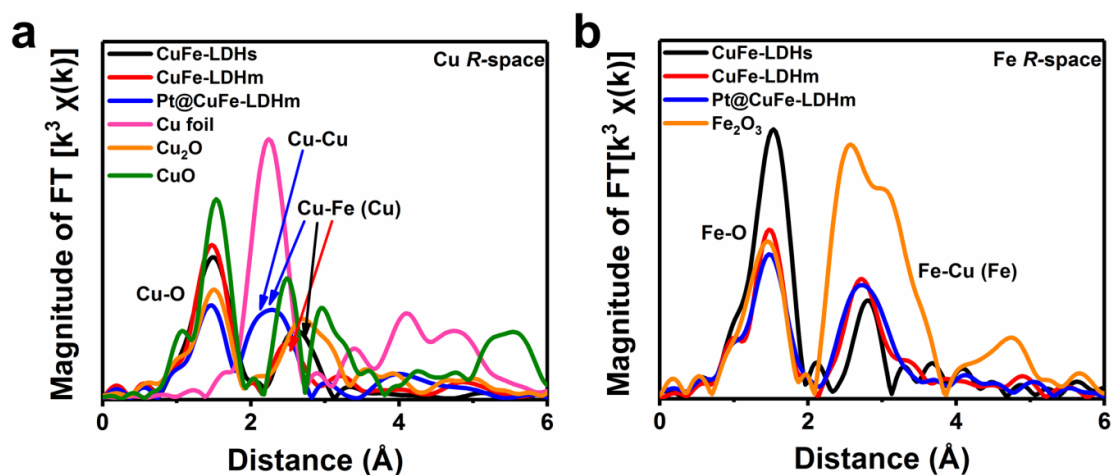

**Fig. S4.** Fourier transform EXAFS spectra of (a) Cu *R*-space and (b) Fe *R*-space for CuFe-LDHs, CuFe-LDHm and Pt@CuFe-LDHm.

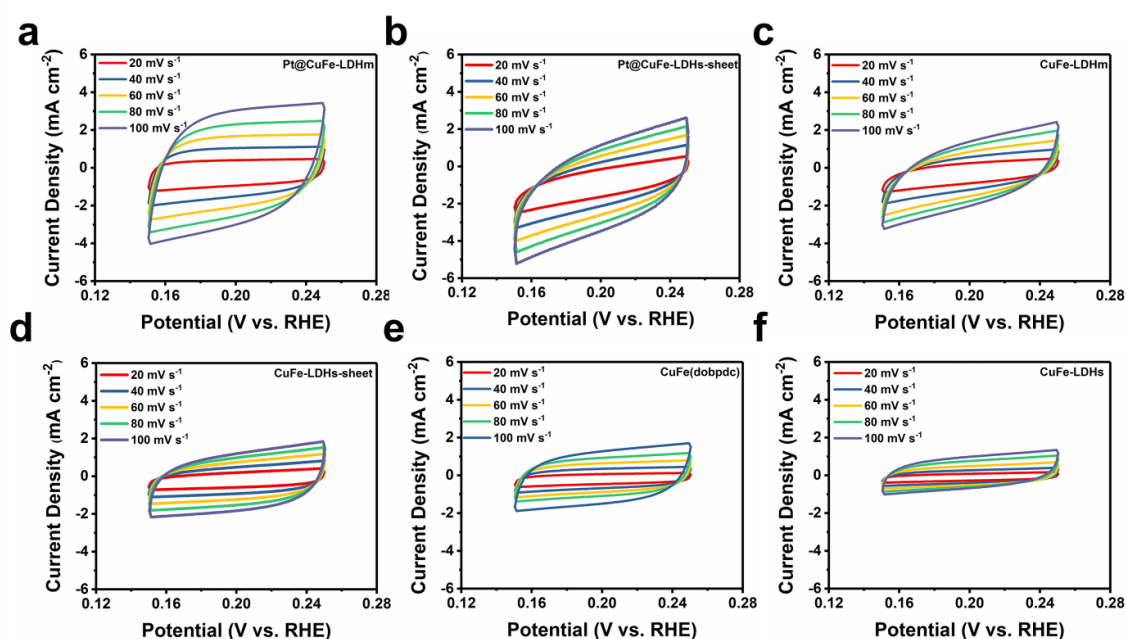

**Fig. S5.** CV curves between 0.15 and 0.25 V vs RHE in 1.0 M KOH electrolyte for (a) Pt@CuFe-LDHm, (b) Pt@CuFe-LDHs-sheet, (c) CuFe-LDHm, (d) CuFe-LDHs-sheet, (e) CuFe(dobpdc) and (f) CuFe-LDHs.



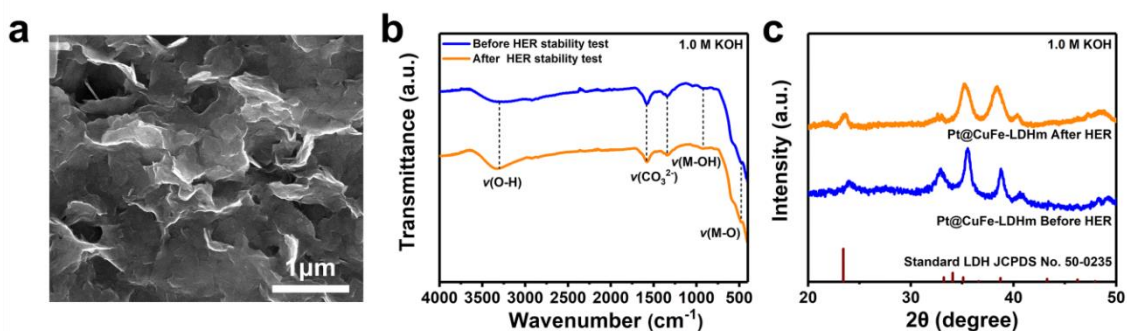

**Fig. S6.** (a) FESEM image, (b) FTIR spectra and (c) PXRD pattern of Pt@CuFe-LDHm after long-term electrocatalytic HER in 1.0 M KOH electrolyte.

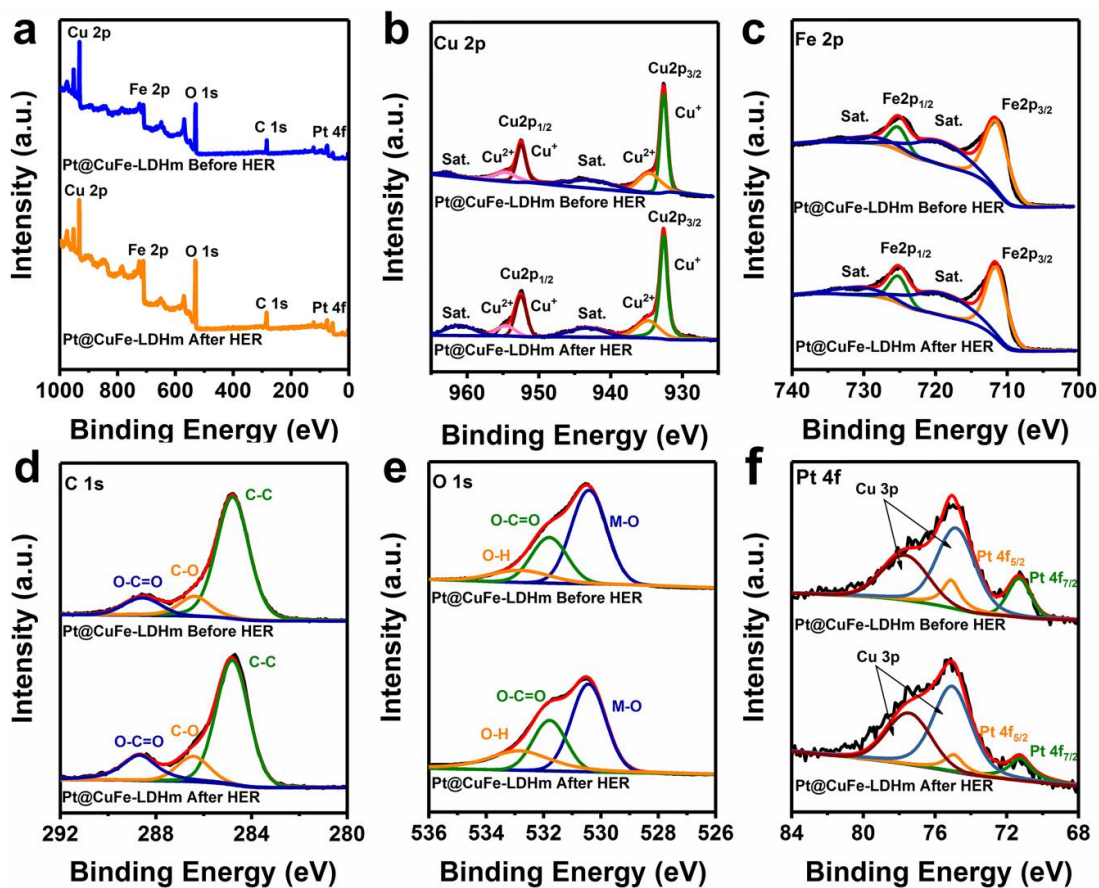

**Fig. S7.** (a) Survey XPS spectra and high-resolution XPS spectra of (b) Cu 2p, (c) Fe 2p, (d) C 1s, (e) O 1s and (f) Pt 4f of Pt@CuFe-LDHm before and after the long-term electrocatalytic HER in 1.0 M KOH electrolyte.

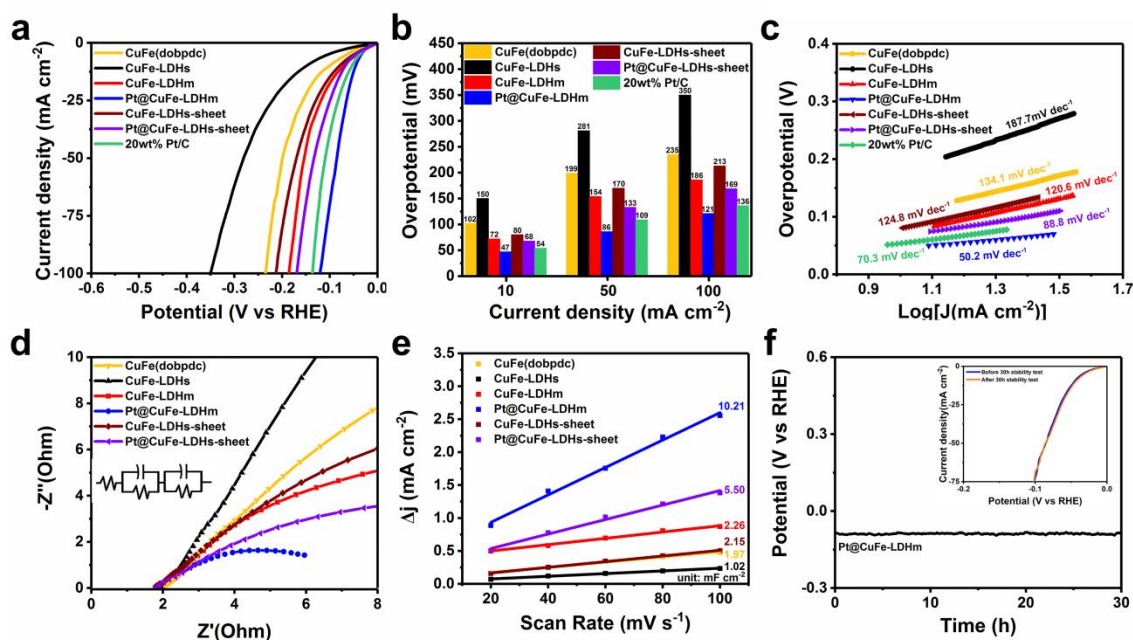

**Fig. S8.** The HER performance of CuFe(dobpdc), CuFe-LDHs, CuFe-LDHm, Pt@CuFe-LDHm, CuFe-LDHs-sheet and Pt@CuFe-LDHs-sheet in 0.1 M KOH electrolyte. (a) LSV curves, (b) overpotentials at current densities of 10, 50 and 100 mA cm<sup>-2</sup>, (c) Tafel slopes, (d) Nyquist plots and (e)  $C_{dl}$  calculations by plotting current densities at 0.2 V vs RHE as function of scan rates. (f) Chronopotentiometry test for Pt@CuFe-LDHm at a constant current density of 10 mA cm<sup>-2</sup> for 30 h. Inset shows the LSV curves before and after the long-term HER electrolysis of Pt@CuFe-LDHm in 0.1 M KOH solution.

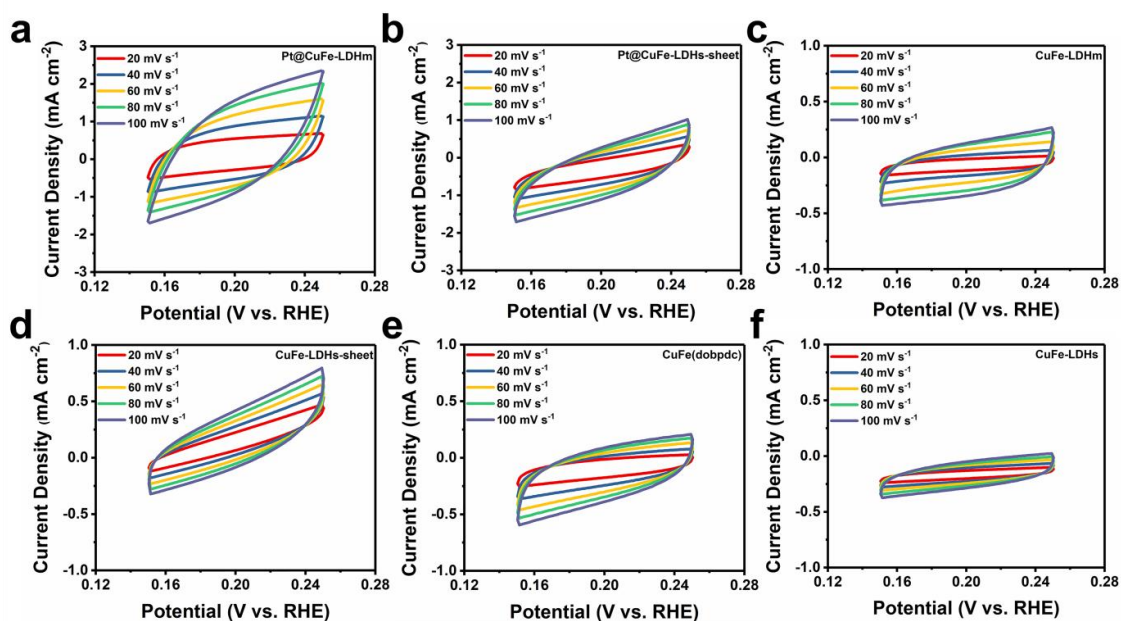

**Fig. S9.** CV curves between 0.15 and 0.25 V vs RHE in 0.1 M KOH electrolyte for (a) Pt@CuFe-LDHm, (b) Pt@CuFe-LDHs-sheet, (c) CuFe-LDHm, (d) CuFe-LDHs-sheet, (e) CuFe(dobpdc) and (f) CuFe-LDHs.

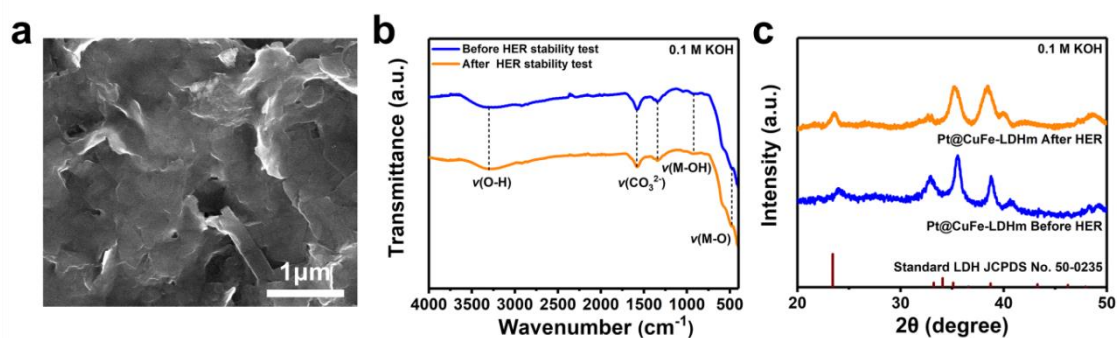

**Fig. S10.** (a) FESEM image, (b) FTIR spectra and (c) PXRD pattern of Pt@CuFe-LDHm after long-term electrocatalytic HER in 0.1 M KOH electrolyte.

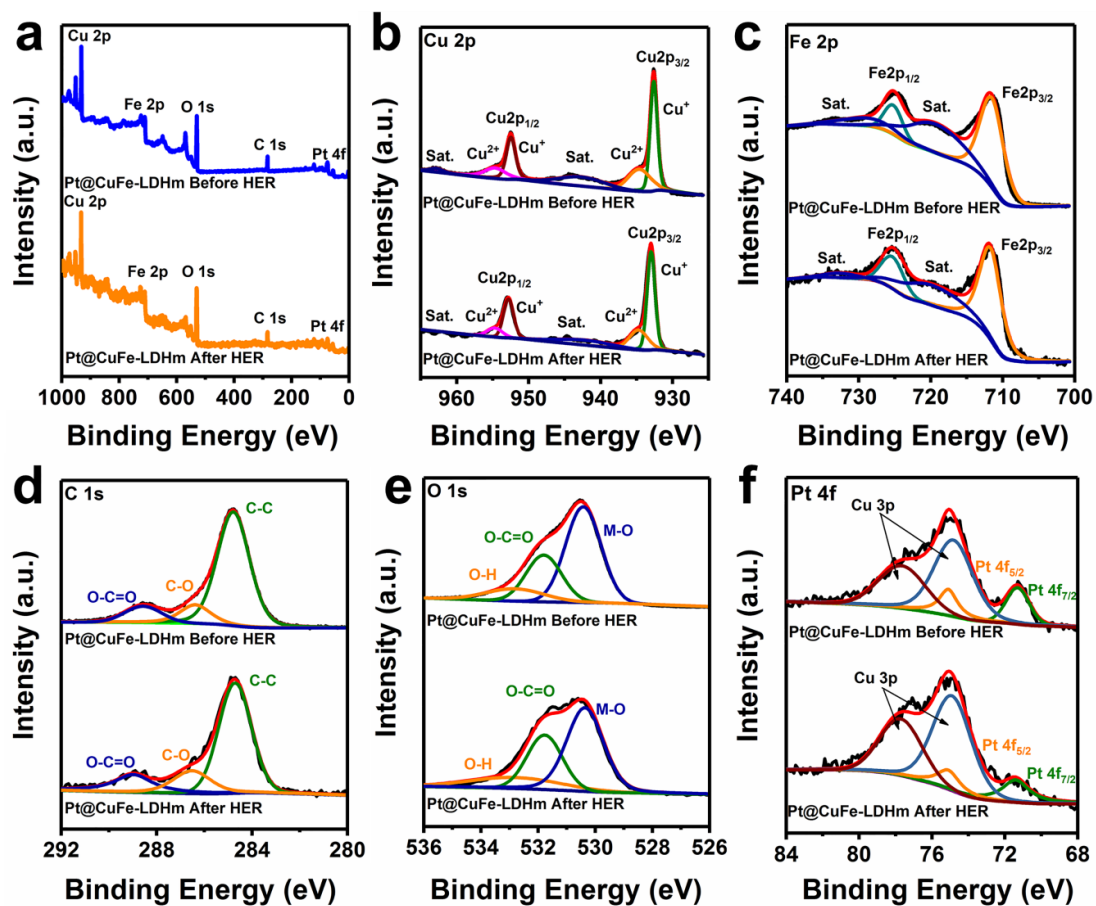

**Fig. S11.** (a) Survey XPS spectra and high-resolution XPS spectra of (b) Cu 2p, (c) Fe 2p, (d) C 1s, (e) O 1s and (f) Pt 4f of Pt@CuFe-LDHm before and after the long-term electrocatalytic HER in 0.1 M KOH electrolyte.

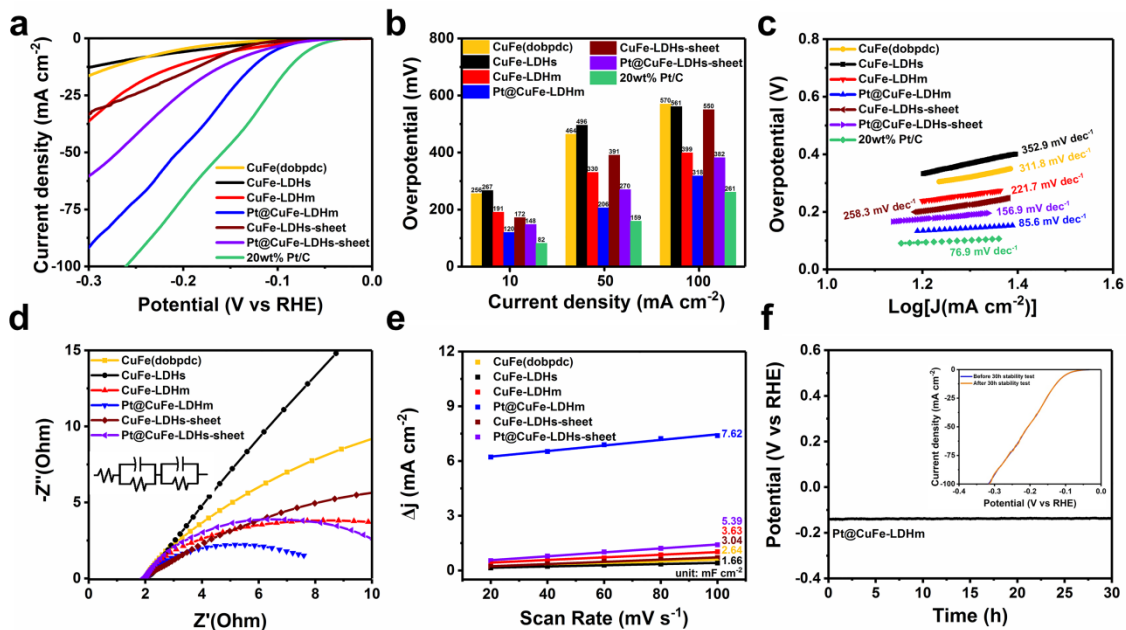

**Fig. S12.** The HER performance of CuFe(dobpdc), CuFe-LDHs, CuFe-LDHm, Pt@CuFe-LDHm, CuFe-LDHs-sheet and Pt@CuFe-LDHs-sheet in 1.0 M PBS electrolyte. (a) LSV curves, (b) overpotentials at current densities of 10, 50 and 100 mA cm<sup>-2</sup>, (c) Tafel slopes, (d) Nyquist plots and (e)  $C_{dl}$  calculations by plotting current densities at 0.2 V vs RHE as function of scan rates. (f) Chronopotentiometry test for Pt@CuFe-LDHm at a constant current density of 10 mA cm<sup>-2</sup> for 30 h. Inset shows the LSV curves before and after the long-term HER electrolysis of Pt@CuFe-LDHm in 1.0 M PBS solution.

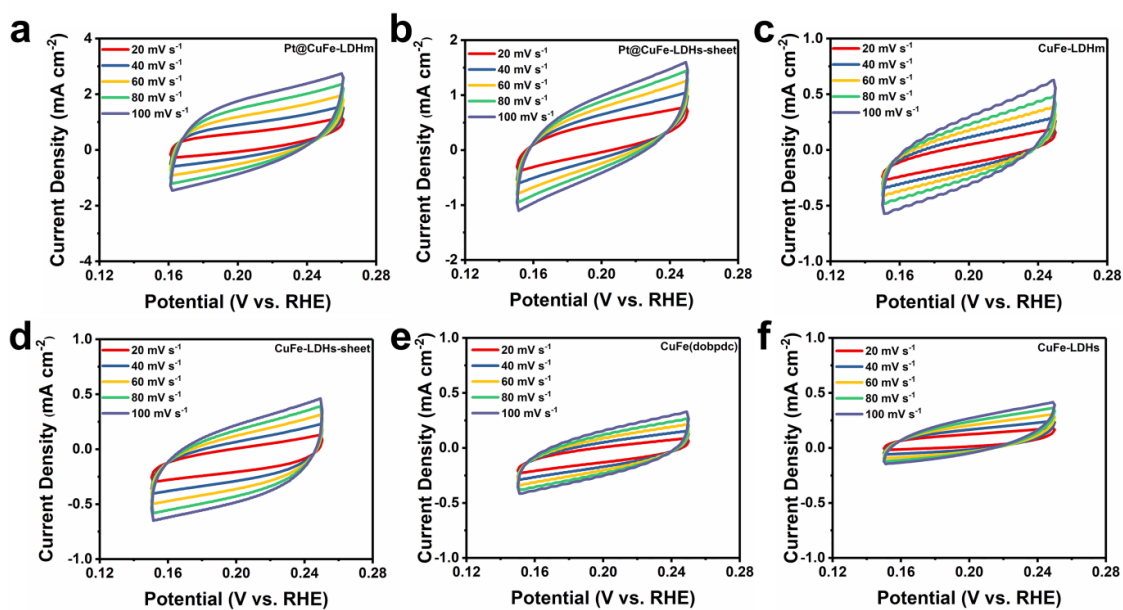

**Fig. S13.** CV curves between 0.15 and 0.25 V vs RHE in 1.0 M PBS electrolyte for (a) Pt@CuFe-LDHm, (b) Pt@CuFe-LDHs-sheet, (c) CuFe-LDHm, (d) CuFe-LDHs-sheet, (e) CuFe(dobpdc) and (f) CuFe-LDHs.

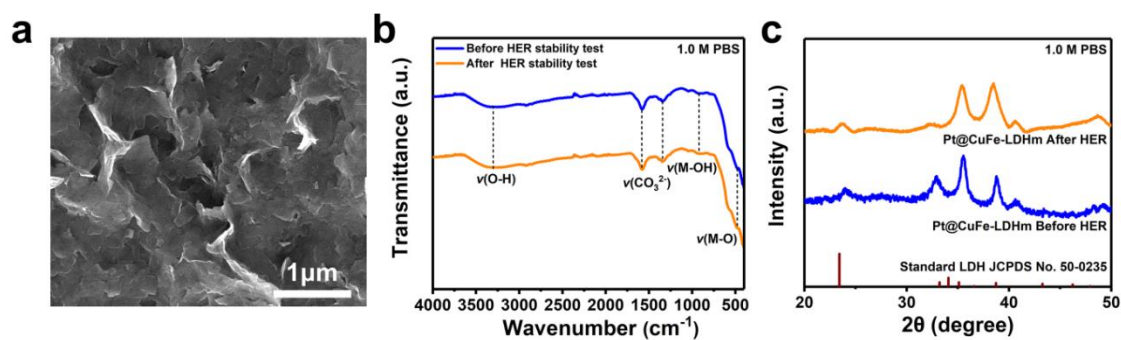

**Fig. S14.** (a) FESEM image, (b) FTIR spectra and (c) PXRD pattern of Pt@CuFe-LDHm after long-term electrocatalytic HER in 1.0 M PBS electrolyte.

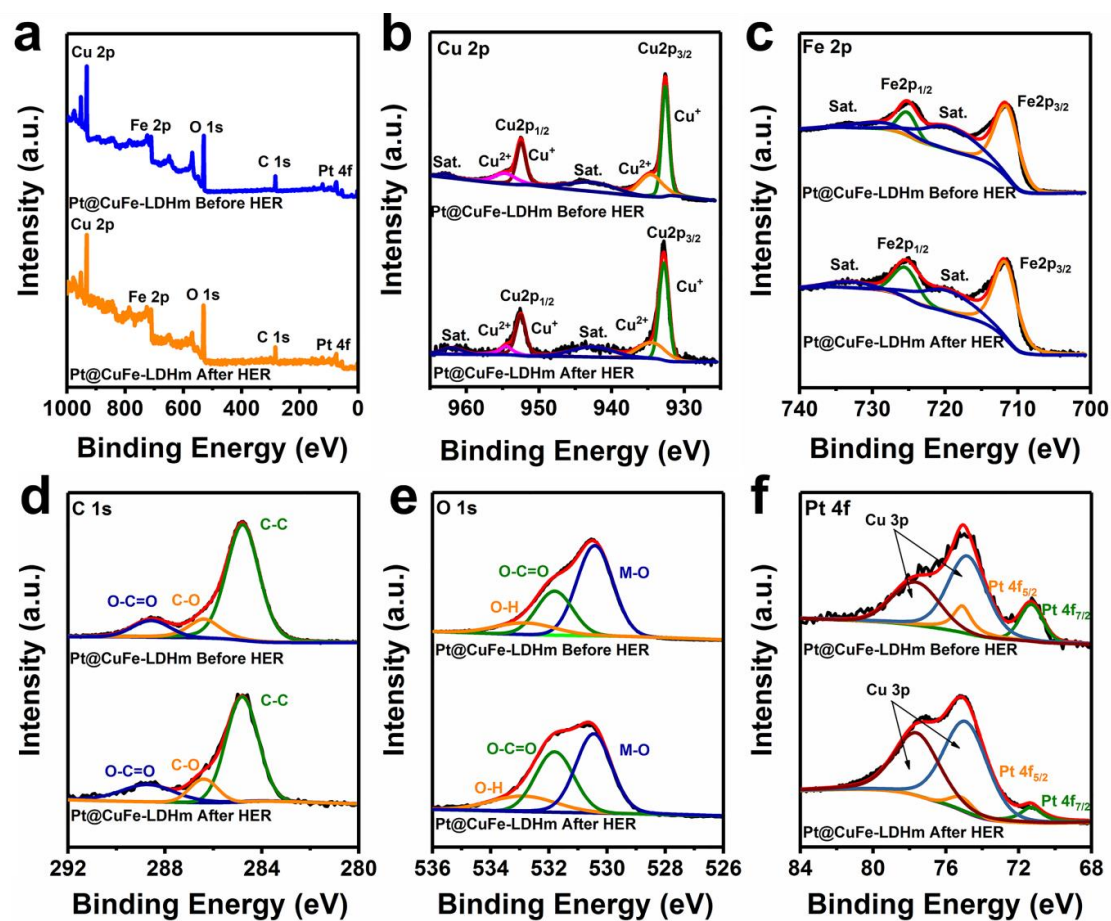

**Fig. S15.** (a) Survey XPS spectra and high-resolution XPS spectra of (b) Cu 2p, (c) Fe 2p, (d) C 1s, (e) O 1s and (f) Pt 4f of Pt@CuFe-LDHm before and after the long-term electrocatalytic HER in 1.0 M PBS electrolyte.

### 3. Supplementary Tables

**Table S1** The contents of metal elements in CuFe-LDHs, CuFe-LDHm and Pt@CuFe-LDHm analyzed by ICP-OES.<sup>2,3</sup>

| Samples      | Cu (wt %) | Fe (wt %) | Pt (wt %) | Cu/Fe molar ratio |
|--------------|-----------|-----------|-----------|-------------------|
| CuFe-LDHs    | 42.5      | 21.4      | -         | 1.8 : 1           |
| CuFe-LDHm    | 42.6      | 20.1      | -         | 1.8 : 1           |
| Pt@CuFe-LDHm | 41.6      | 21.6      | 1.1       | 1.7 : 1           |

**Table S2.** BET surface area and pore size of Pt@CuFe-LDHm and other recently reported electrocatalysts.

| Electrocatalysts    | BET surface area (m <sup>2</sup> g <sup>-1</sup> ) | Pore size (nm) | References       |
|---------------------|----------------------------------------------------|----------------|------------------|
| <b>CuFe-LDHm</b>    | <b>90</b>                                          | <b>27</b>      |                  |
| <b>Pt@CuFe-LDHm</b> | <b>84</b>                                          | <b>27</b>      | <b>This work</b> |
| <b>CuFe-LDHs</b>    | <b>38</b>                                          | <b>1.4-9</b>   |                  |
| CoNi-LDH            | 10.3                                               | 25             | 4                |
| MgAl-LDH            | 18.6                                               | 12.5           | 5                |
| CoFe-LDH            | 76.0                                               | 2-10           | 6                |
| CoFe-LDH            | 50.1                                               | 7.6            | 7                |



**Table S3.** Electrocatalytic HER performance of Pt@CuFe-LDHm and other recently reported HER electrocatalysts.

| Electrocatalysts                                                          | Electrolytes     | Overpotentials<br>(mV @ mA cm <sup>-2</sup> ) | Tafel slopes<br>(mV dec <sup>-1</sup> ) | References       |
|---------------------------------------------------------------------------|------------------|-----------------------------------------------|-----------------------------------------|------------------|
|                                                                           | <b>1.0 M KOH</b> | <b>33 @ 10</b>                                | <b>34.0</b>                             |                  |
| <b>Pt@CuFe-LDHm</b>                                                       | <b>0.1 M KOH</b> | <b>47 @ 10</b>                                | <b>50.2</b>                             |                  |
|                                                                           | <b>1.0 M PBS</b> | <b>120 @ 10</b>                               | <b>85.6</b>                             | <b>This work</b> |
|                                                                           | <b>1.0 M KOH</b> | <b>63 @ 10</b>                                | <b>40.9</b>                             |                  |
| <b>CuFe-LDHm</b>                                                          | <b>0.1 M KOH</b> | <b>71 @ 10</b>                                | <b>120.6</b>                            |                  |
|                                                                           | <b>1.0 M PBS</b> | <b>191 @ 10</b>                               | <b>221.7</b>                            |                  |
| CuFe-LDH/NF                                                               | 1.0 M NaOH       | 159 @ 10                                      | 123.0                                   | 8                |
| CuFe-P/NF                                                                 | 1.0 M KOH        | 153 @ 10                                      | 125.4                                   | 9                |
| Fe(OH) <sub>x</sub> @Cu-MOF                                               | 1.0 M KOH        | 112 @ 10                                      | 76.0                                    | 10               |
| Cu <sub>0.50</sub> Fe <sub>0.50</sub> /NF                                 | 1.0 M KOH        | 158 @ 10                                      | 62.2                                    | 11               |
| Fe(PO <sub>3</sub> ) <sub>2</sub> @Cu <sub>3</sub> P                      | 1.0 M KOH        | 108 @ 10                                      | 84.0                                    | 12               |
| Cu <sub>2.75</sub> Fe <sub>0.25</sub> P                                   | 1.0 M KOH        | 158 @ 100                                     | 67.5                                    | 13               |
| NiCu <sub>0.05</sub> Fe <sub>0.025</sub>                                  | 1.0 M KOH        | 60 @ 10                                       | 60.8                                    | 14               |
| FeCoCuP@NC                                                                | 1.0 M KOH        | 169 @ 10                                      | 48.8                                    | 15               |
| Fe-Cu@CN <sub>3</sub>                                                     | 1.0 M KOH        | 91 @ 10                                       | 117.0                                   | 16               |
| Fe <sub>0.43</sub> Co <sub>2.57</sub> (PO <sub>4</sub> ) <sub>2</sub> /Cu | 1.0 M KOH        | 108 @ 100                                     | 30.3                                    | 17               |
| ZIF@LDH@Ni foam-600                                                       | 1.0 M KOH        | 106 @ 10                                      | 109.0                                   | 18               |
| NiFe-LDH + 2D-Pt                                                          | 1.0 M KOH        | 61 @ 100                                      | 32.3                                    | 19               |
| V <sub>0.3</sub> -CoFe-LDH                                                | 1.0 M KOH        | 98 @ 10                                       | 78.0                                    | 20               |
| Rh-doped CoFe-LDH                                                         | 1.0 M KOH        | 75 @ 10                                       | 42.8                                    | 21               |
| Ni-Fe-Pt NCs                                                              | 1.0 M KOH        | 463 @ 10                                      | 81.0                                    | 22               |
| PtCu-MoO <sub>2</sub> @C                                                  | 1.0 M KOH        | 37 @ 10                                       | 36.0                                    | 23               |
| Ni-MOF@Pt                                                                 | 1.0 M KOH        | 102 @ 10                                      | 88.0                                    | 24               |
| NiVB/rGO                                                                  | 0.1 M KOH        | 315 @ 10                                      | 128.0                                   | 25               |
| NiFe LDH-POM                                                              | 0.1 M KOH        | 156 @ 10                                      | 86.0                                    | 26               |
| Ni-Fe clusters                                                            | 0.1 M KOH        | 71 @ 10                                       | -                                       | 27               |
| C-ZIF-CuPt                                                                | 0.1 M KOH        | 46 @ 10                                       | 45.0                                    | 28               |
| Cu-Ni <sub>3</sub> S <sub>2</sub>                                         | 1.0 M PBS        | 228 @ 10                                      | 151.0                                   | 29               |
| Cu-CoP NRAs/CC                                                            | 1.0 M PBS        | 137 @ 10                                      | 144.0                                   | 30               |
| Cu(OH) <sub>2</sub> NRs@Ni(OH) <sub>2</sub> NSs                           | 1.0 M PBS        | 200 @ 10                                      | 120.0                                   | 31               |
| GO-Fe,Ni HHNs                                                             | 1.0 M PBS        | 190 @ 10                                      | 110.0                                   | 32               |
| Fe-Mo <sub>2</sub> C@NCF                                                  | 1.0 M PBS        | 130 @ 10                                      | 109.0                                   | 33               |
| Co-Fe-P nanotubes                                                         | 1.0 M PBS        | 138 @ 10                                      | 138.0                                   | 34               |
| Fe-Co-Ni-B/BVG                                                            | 1.0 M PBS        | 168 @ 10                                      | 42.0                                    | 35               |
| Mn-FeP                                                                    | 1.0 M PBS        | 157 @ 10                                      | 78.0                                    | 36               |
| FeP NPs@NPC                                                               | 1.0 M PBS        | 386 @ 10                                      | 149.0                                   | 37               |
| S-NiFe <sub>2</sub> O <sub>4</sub>                                        | 1.0 M PBS        | 197 @ 10                                      | 81.3                                    | 38               |

**Table S4.** Comparison of the onset potentials of prepared electrocatalysts in 1.0 M KOH, 0.1 M KOH and 1.0 M PBS.

| Onset Potential (mV) | 1.0 M KOH | 0.1 M KOH | 1.0 M PBS |
|----------------------|-----------|-----------|-----------|
| Pt@CuFe-LDHm         | 1.6       | 8.8       | 61.8      |
| CuFe-LDHm            | 3.6       | 10.8      | 68.0      |
| Pt@CuFe-DHs-sheet    | 1.7       | 9.5       | 64.0      |
| CuFe-DHs-sheet       | 4.6       | 11.4      | 98.0      |
| CuFe-LDHs            | 50.6      | 26.8      | 88.0      |
| CuFe(dobpdc)         | 57.6      | 12.8      | 117.0     |

## References

- 1 C. W. Pao, J. L. Chen, J. F. Lee, M. C. Tsai, C. Y. Huang, C. C. Chiu and Y. S. Huang, *J. Synchrotron Rad.*, 2021, **28**, 930-938.
- 2 H. Yang, T. Guo, D. Yin, Q. Liu, X. Zhang and X. Zhang, *J. Taiwan Inst. Chem. E.*, 2020, **112**, 212-221.
- 3 F. Dionigi, J. Zhu, Z. Zeng, T. Merzdorf, H. Sarodnik, M. Gliech, L. Pan, W. Li, J. Greeley and P. Strasser, *Angew. Chem. Int. Ed.*, 2021, **133**, 14567-14578.
- 4 L. Xie, S. Chen, Y. Hu, Y. Lan, X. Li, Q. Deng, J. Wang, Z. Zeng and S. Deng, *J. Alloy. Compd.*, 2021, **858**, 157652.
- 5 L. D. Silva Neto, C. G. Anchieta, J. L. S. Duarte, L. Meili and J. T. Freire, *ACS Omega*, 2021, **6**, 21819-21829.
- 6 L. Han, C. Dong, C. Zhang, Y. Gao, J. Zhang, H. Gao, Y. Wang and Z. Zhang, *Nanoscale*, 2017, **9**, 16467-16475.
- 7 B. Wang, W. X. Lu, Z. Q. Huang, D. S. Pan, L. L. Zhou, Z. H. Guo and J. L. Song, *Chem. Eng. J.*, 2020, **399**, 125799.
- 8 M. Bhavanari, K. R. Lee, C. J. Tseng, I. H. Tang and H. H. Chen, *Int. J. Hydrog. Energy*, 2021, **46**, 35886-35895.
- 9 X. Xing, Y. Song, W. Jiang and X. Zhang, *Sustain. Energ. Fuels*, 2020, **4**, 3985-3991.
- 10 W. Cheng, H. Zhang, D. Luan and X. W. Lou, *Sci. Adv.* 2021, **7**, 2580.
- 11 A. I. Inamdar, H. S. Chavan, B. Hou, C. H. Lee, S. U. Lee, S. Cha, H. Kim and H. Im, *Small*, 2020, **16**, 1905884.
- 12 D. Dai, B. Wei, Y. Li, X. Ma, S. Liang, S. Wang and L. Xu, *J. Alloy. Compd.*, 2020, **820**, 153185.
- 13 I. Mondal, A. Mahata, H. Kim, U. Pal, F. De Angelis and J. Y. Park, *Nanoscale*, 2020, **12**, 17769-17779.
- 14 C. Hegde, X. Sun, K. N. Dinh, A. Huang, H. Ren, B. Li, R. Dangol, C. Liu, Z. Wang, Q. Yan and H. Li, *ACS Appl. Mater. Interfaces*, 2020, **12**, 2380-2389.
- 15 S. Li, Q. Zhang, J. Sun and J. Guan, *Mater. Today Energy*, 2020, **17**, 100464.
- 16 Q. He, H. Liu, P. Tan, J. Xie, S. Si and J. Pan, *J. Solid State Chem*, 2021, **299**, 122179.
- 17 C. Yang, T. He, W. Zhou, R. Deng and Q. Zhang, *ACS Sustain. Chem. Eng.*, 2020, **8**, 13793-13804.
- 18 Y. Tang, X. Fang, X. Zhang, G. Fernandes, Y. Yan, D. Yan, X. Xiang and J. He, *ACS Appl. Mater. Interfaces*, 2017, **9**, 36762-36771.

- 19 S. W. Jang, S. Dutta, A. Kumar, Y. R. Hong, H. Kang, S. Lee, S. Ryu, W. Choi and I. S. Lee, *ACS Nano*, 2020, **14**, 10578-10588.
- 20 B. Singh and A. Indra, *Dalton Trans*, 2021, **50**, 2359-2363.
- 21 K. Zhu, J. Chen, W. Wang, J. Liao, J. Dong, M. O. L. Chee, N. Wang, P. Dong, P. M. Ajayan, S. Gao, J. Shen and M. Ye, *Adv. Funct. Mater.*, 2020, **30**, 2003556.
- 22 M. Fu, Q. Zhang, Y. Sun, G. Ning, X. Fan, H. Wang, H. Lu, Y. Zhang and H. Wang, *Int. J. Hydro. Energy*, 2020, **45**, 20832-20842.
- 23 C. Zhang, P. Wang, W. Li, Z. Zhang, J. Zhu, Z. Pu, Y. Zhao and S. Mu, *J. Mater. Chem. A*, 2020, **8**, 19348-19356.
- 24 K. Rui, G. Zhao, M. Lao, P. Cui, X. Zheng, X. Zheng, J. Zhu, W. Huang, S. X. Dou and W. Sun, *Nano Lett.*, 2019, **19**, 8447-8453.
- 25 M. Arif, G. Yasin, M. Shakeel, M. A. Mushtaq, W. Ye, X. Fang, S. Ji and D. Yan, *J. Energy Chem.*, 2021, **58**, 237-246.
- 26 C. Li, Z. Zhang and R. Liu, *Small*, 2020, **16**, 2003777.
- 27 S. Xue, R. W. Haid, R. M. Kluge, X. Ding, B. Garlyyev, J. Fichtner, S. Watzele, S. Hou and A. S. Bandarenka, *Angew. Chem. Int. Ed.*, 2020, **59**, 10934-10938.
- 28 C. Wang, L. Kuai, W. Cao, H. Singh, A. Zakharov, Y. Niu, H. Sun and B. Geng, *Chem. Eng. J.*, 2021, **426**, 130749.
- 29 L. Zhang, X. Gao, Y. Zhu, A. Liu, H. Dong, D. Wu, Z. Han, W. Wang, Y. Fang, J. Zhang, Z. Kou, B. Qian and T. T. Wang, *Nanoscale*, 2021, **13**, 2456-2464.
- 30 L. Wen, Y. Sun, C. Zhang, J. Yu, X. Li, X. Lyu, W. Cai and Y. Li, *ACS Appl. Energy Mater.*, 2018, **1**, 3835-3842.
- 31 J. Hu and Y. Liu, *ChemistrySelect*, 2021, **6**, 4129-4134.
- 32 J. Hu and Y. Liu, *Mater. Res. Express*, 2021, **8**, 035506.
- 33 J. Huang, J. Wang, R. Xie, Z. Tian, G. Chai, Y. Zhang, F. Lai, G. He, C. Liu, T. Liu, P. R. Shearing and D. J. L. Brett, *J. Mater. Chem. A*, 2020, **8**, 19879-19886.
- 34 J. Chen, J. Liu, J. Q. Xie, H. Ye, X. Z. Fu, R. Sun and C. P. Wong, *Nano Energy*, 2019, **56**, 225-233.
- 35 Y. Man, F. Shaik, B. Jiang and J. Zheng, *J. Electrochem. Soc.*, 2020, **167**, 122513.
- 36 M. Wang, Y. Tuo, X. Li, Q. Hua, F. Du and L. Jiang, *ACS Sustain. Chem. Eng.*, 2019, **7**, 12419.
- 37 Z. Pu, I. S. Amiin, C. Zhang, M. Wang, Z. Kou and S. Mu, *Nanoscale*, 2017, **9**, 3555-3560.
- 38 J. Liu, D. Zhu, T. Ling, A. Vasileff and S. Z. Qiao, *Nano Energy*, 2017, **40**, 264-273.
